# Supplementary material for: Integrated synthesis of metallocene@support catalysts based on glyphosate and its zirconium derivatives
Source: Royal Society of Chemistry journal article supplement (doi:10.1039/c7ra11089h), 2017-01-01
Supplement: c7ra11089h1.pdf [file c7ra11089h1.pdf]

Supporting information

## **Integrated Synthesis of Metallocene@Support Catalysts Based on Glyphosate and its Zirconium Derivatives**

Annan Zhou<sup>a</sup>, Yuejuan Zhang<sup>b</sup>, Yasai Shi<sup>a</sup> and Qinghong Xu<sup>a,\*</sup>

<sup>a</sup> *State Key Laboratory of Chemical Resource Engineering, Beijing University of Chemical Technology, Box. 98, 15 Beisanhuan Donglu, Beijing 100029, P. R. China*

<sup>b</sup> *Beijing Vocational College of Agriculture, No. 46, Beiyuan Road, Chaoyang District, Beijing 100012, P. R. China*

## 1, Solid-state $^{31}\text{P}$ MAS NMR to $\text{Cp}_2\text{Zr@Gly}$

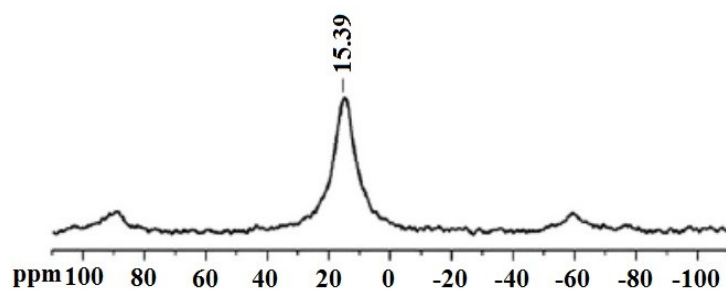

Fig. S1 Solid-state  $^{31}\text{P}$  MAS NMR to  $\text{Cp}_2\text{Zr@Gly}$

Solid-state  $^{31}\text{P}$  MAS NMR to  $\text{Cp}_2\text{Zr@Gly}$  is shown in Fig. S1. The shift of P in  $\text{Cp}_2\text{Zr@Gly}$  is at about 15.39.

## 2, FT-IR Analysis to $\text{Cp}_2\text{ZrCl}_2@\text{SiO}_2$

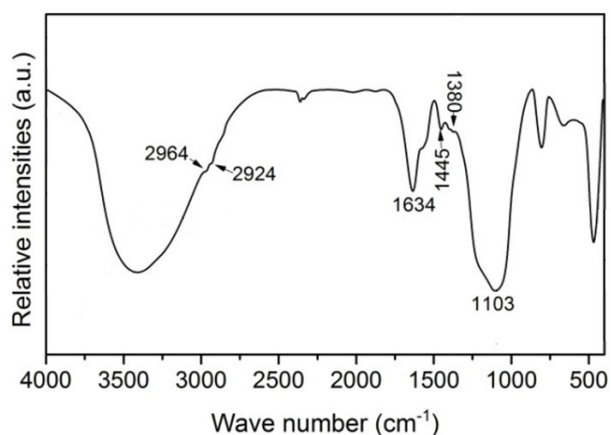

Fig. S2 FT-IR spectrum of  $\text{Cp}_2\text{ZrCl}_2@\text{SiO}_2$

FT-IR spectrum of  $\text{Cp}_2\text{ZrCl}_2@\text{SiO}_2$  is shown in Fig. S2. The weak peaks at 3700-3300  $\text{cm}^{-1}$  are assigned as structurally inaccessible hydrogen-bonded OH groups. The adsorptions, at about 2964, 2924, and 1634  $\text{cm}^{-1}$ , corresponding to stretching and bending modes of the cyclopentadienyl ligands are all found in the spectrum. The adsorption coming from the Si-O-Si mode of silica itself is observed at 1103  $\text{cm}^{-1}$ . The result indicates that the adsorption of  $\text{Cp}_2\text{ZrCl}_2$  on surface of silica gel is successful.

### 3. UV/VIS Analysis to $\text{Cp}_2\text{ZrCl}_2@\text{SiO}_2$

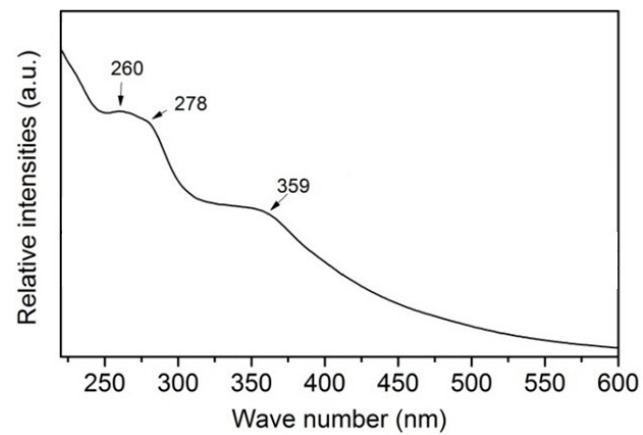

Fig. S3 UV/Vis spectra of  $\text{Cp}_2\text{ZrCl}_2@\text{SiO}_2$

Fig. S3 presents UV/Vis spectrum of  $\text{Cp}_2\text{ZrCl}_2@\text{SiO}_2$ . The absorption from  $\text{Cp}_2\text{ZrCl}_2$  is found at 278 nm, proving the adsorption of  $\text{Cp}_2\text{ZrCl}_2$  on surface of silica gel.
